# Supplementary material
Source: MDPI journal article supplement (https://www.mdpi.com/1424-8247/16/2/278)
Supplement: s1 [file s1]

## Table of content

|                                                                                                                                                                                                                                                                                                                                                               |   |
|---------------------------------------------------------------------------------------------------------------------------------------------------------------------------------------------------------------------------------------------------------------------------------------------------------------------------------------------------------------|---|
| <b>Figure S1.</b> UV-trace and respective MALDI-TOF spectrum of (a) DOTA-MGS5 (b) DOTA-[2NaI <sup>8</sup> ]MGS5, (c) DOTA-[DLys <sup>1</sup> ]MGS5, (d) DOTA-[(N-Me)1NaI <sup>8</sup> ]MGS5, (e) DOTA-MGS5[NHCH <sub>3</sub> ] and (f) DOTA-[Phe <sup>8</sup> ]MGS5.                                                                                          | 3 |
| <b>Figure S2.</b> Radiochromatogram of (a) [ <sup>111</sup> In]In-DOTA-MGS5 (b) [ <sup>111</sup> In]In-DOTA-[2NaI <sup>8</sup> ]MGS5, (c) [ <sup>111</sup> In]In-DOTA-[DLys <sup>1</sup> ]MGS5, (d) [ <sup>111</sup> In]In-DOTA-MGS5[NHCH <sub>3</sub> ] and (e) [ <sup>111</sup> In]In-DOTA-[Phe <sup>8</sup> ]MGS5.                                         | 4 |
| <b>Figure S3.</b> Radiochromatogram of (a) [ <sup>111</sup> In]In-DOTA-[(N-Me)1NaI <sup>8</sup> ]MGS5 (b) [ <sup>68</sup> Ga]Ga-DOTA-[(N-Me)1NaI <sup>8</sup> ]MGS5 and (c) [ <sup>177</sup> Lu]Lu-DOTA-[(N-Me)1NaI <sup>8</sup> ]MGS5.                                                                                                                       | 5 |
| <b>Table S1.</b> Summary of the analytical data of DOTA-[(N-Me)1NaI <sup>8</sup> ]MGS5 labeled with different radiometals                                                                                                                                                                                                                                     | 6 |
| <b>Figure S4.</b> Cell internalization of DOTA-[(N-Me)1NaI <sup>8</sup> ]MGS5 labeled with different radiometals 2 h after incubation. Gray: indium-111, striped: lutetium-177 and checked: gallium-68.                                                                                                                                                       | 6 |
| <b>Figure S5.</b> Representative radiochromatograms of the <sup>111</sup> In-labeled peptides post preparation (p.p.), as well as kidney and liver samples obtained from BALB/c mice 10 min p.i. Pink: DOTA-[2NaI <sup>8</sup> ]MGS5, green: DOTA-[DLys <sup>1</sup> ]MGS5, purple: DOTA-[(N-Me)1NaI <sup>8</sup> ]MGS5, blue: DOTA-MGS5[NHCH <sub>3</sub> ]. | 7 |

(a)

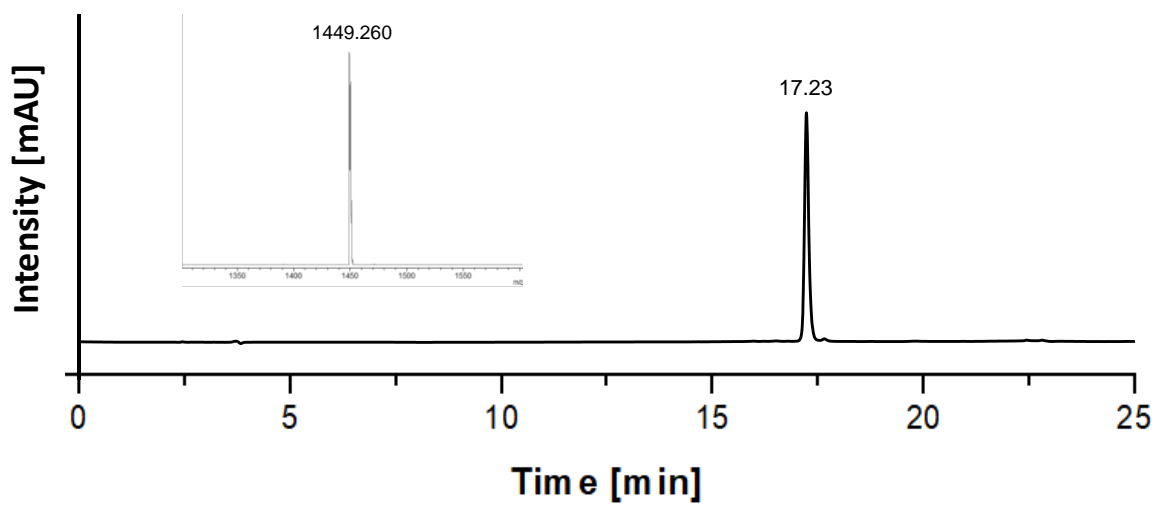

(b)

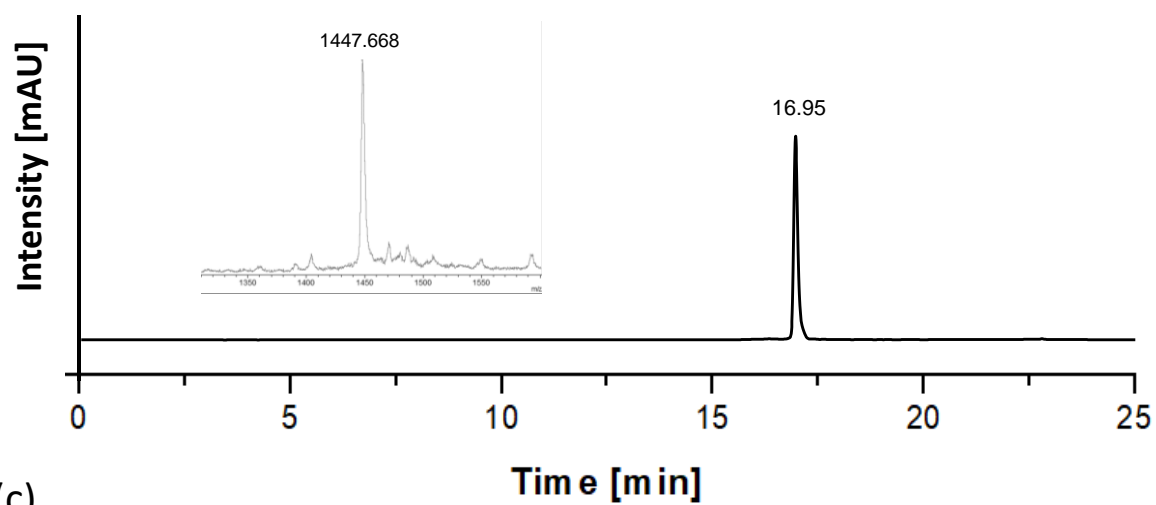

(c)

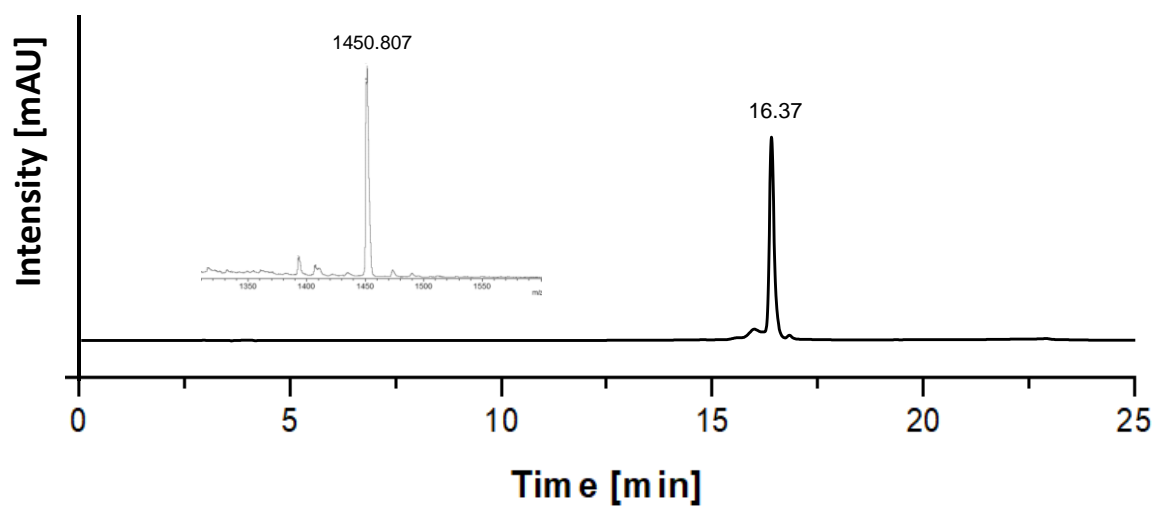

(d)

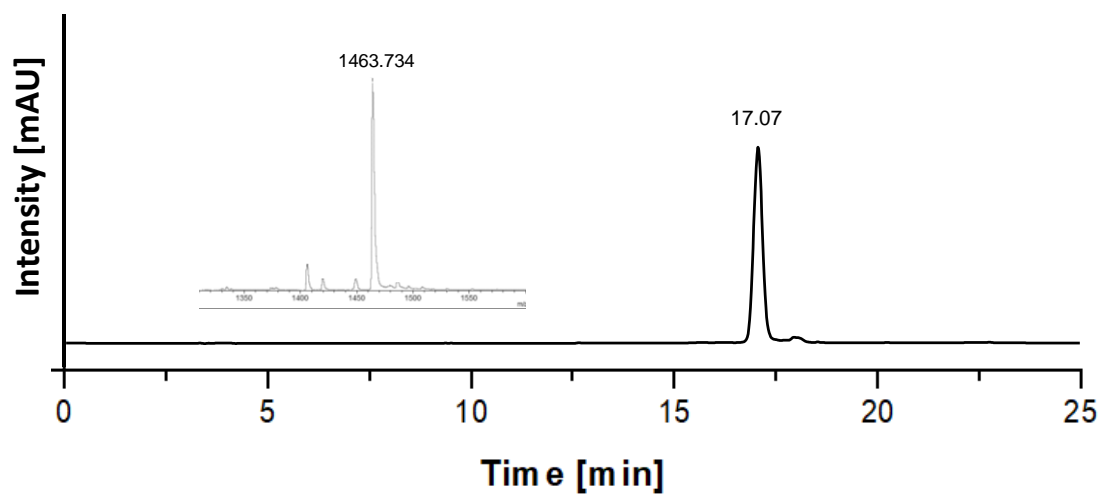

(e)

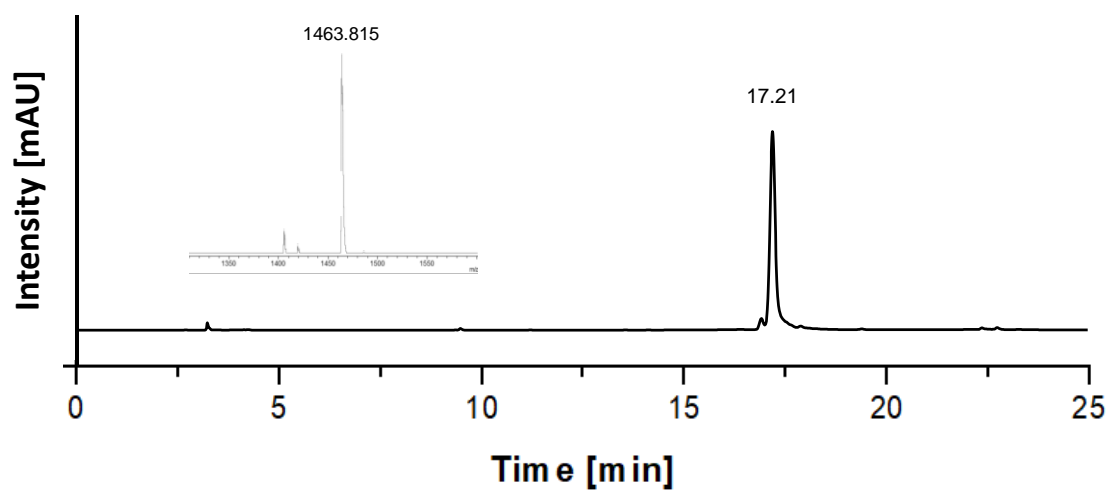

(f)

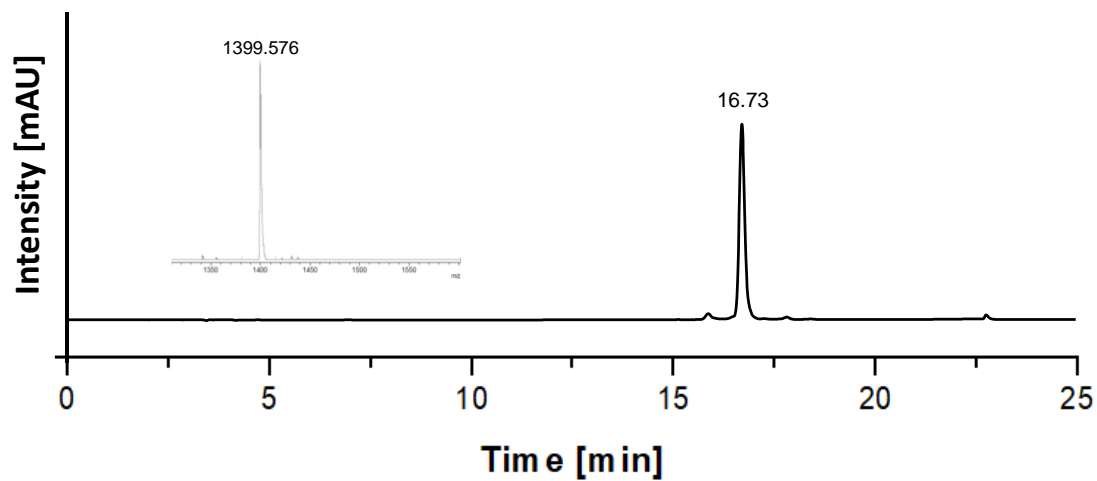

**Figure S1.** UV-trace and respective MALDI-TOF spectrum of (a) DOTA-MGS5 (b) DOTA-[2NaI<sup>8</sup>]MGS5, (c) DOTA-[DLys<sup>1</sup>]MGS5, (d) DOTA-[(N-Me)1NaI<sup>8</sup>]MGS5, (e) DOTA-MGS5[NHCH<sub>3</sub>] and (f) DOTA-[Phe<sup>8</sup>]MGS5.

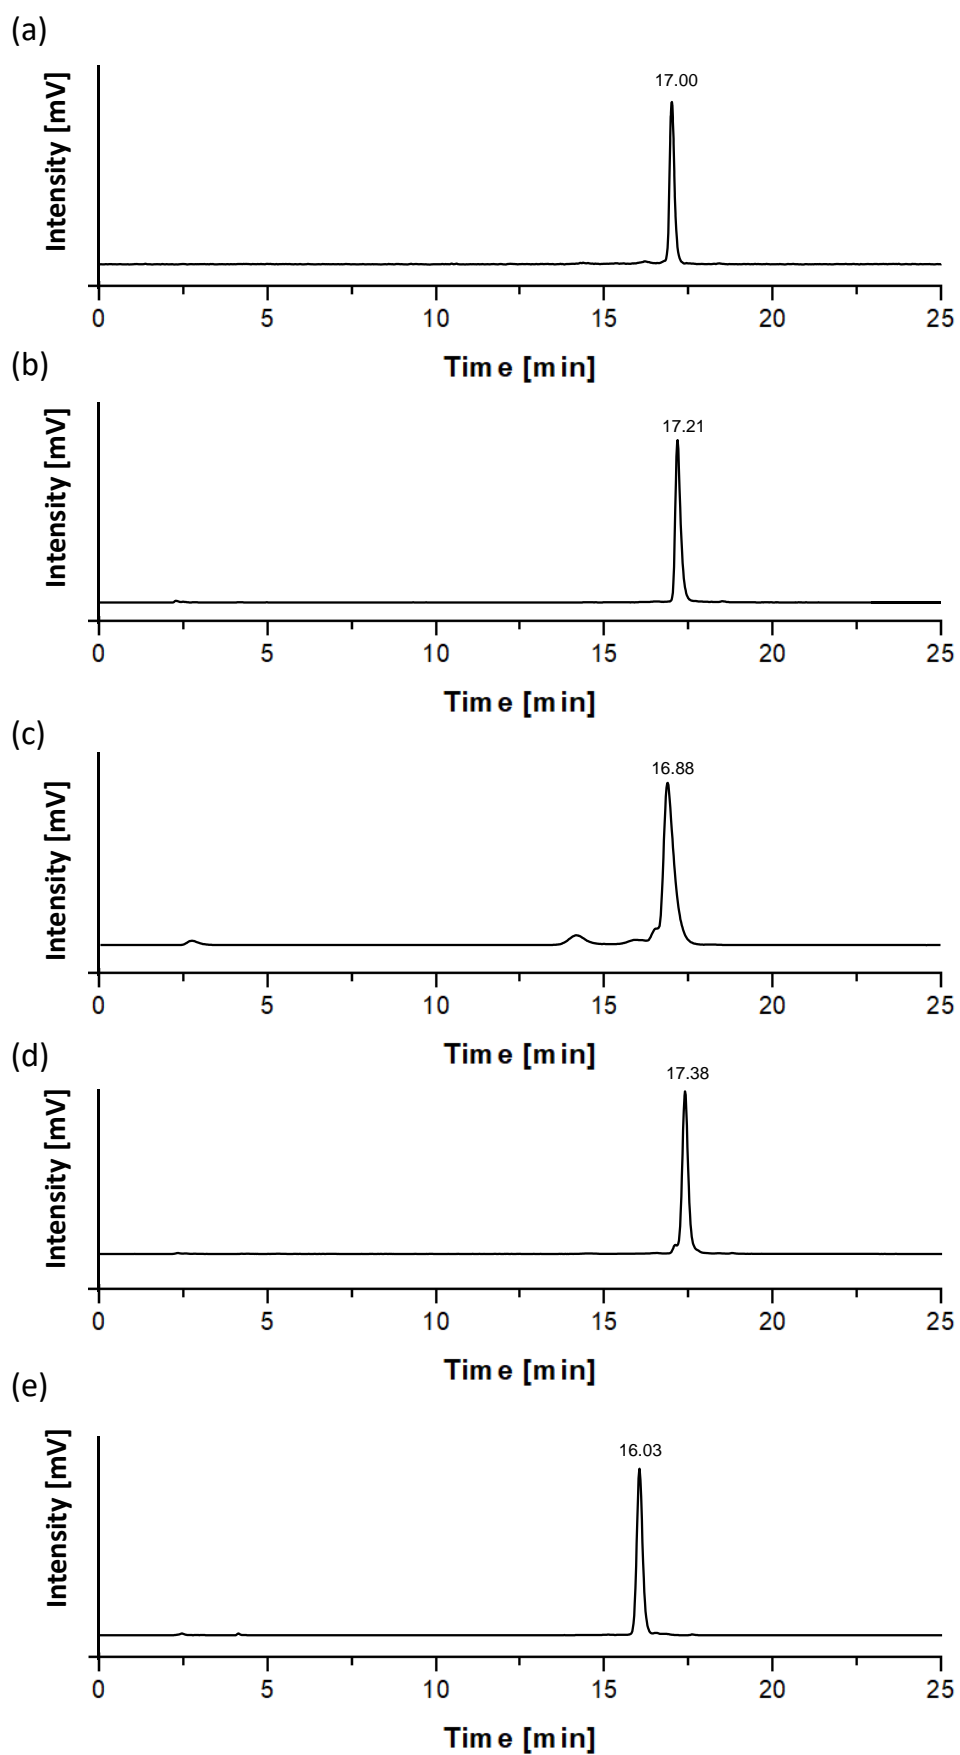

**Figure S2.** Radiochromatogram of (a) [ $^{111}\text{In}$ ]In-DOTA-MGS5 (b) [ $^{111}\text{In}$ ]In-DOTA-[2NaI $^8$ ]MGS5, (c) [ $^{111}\text{In}$ ]In-DOTA-[DLys $^1$ ]MGS5, (d) [ $^{111}\text{In}$ ]In-DOTA-MGS5[NHCH $_3$ ] and (e) [ $^{111}\text{In}$ ]In-DOTA-[Phe $^8$ ]MGS5.

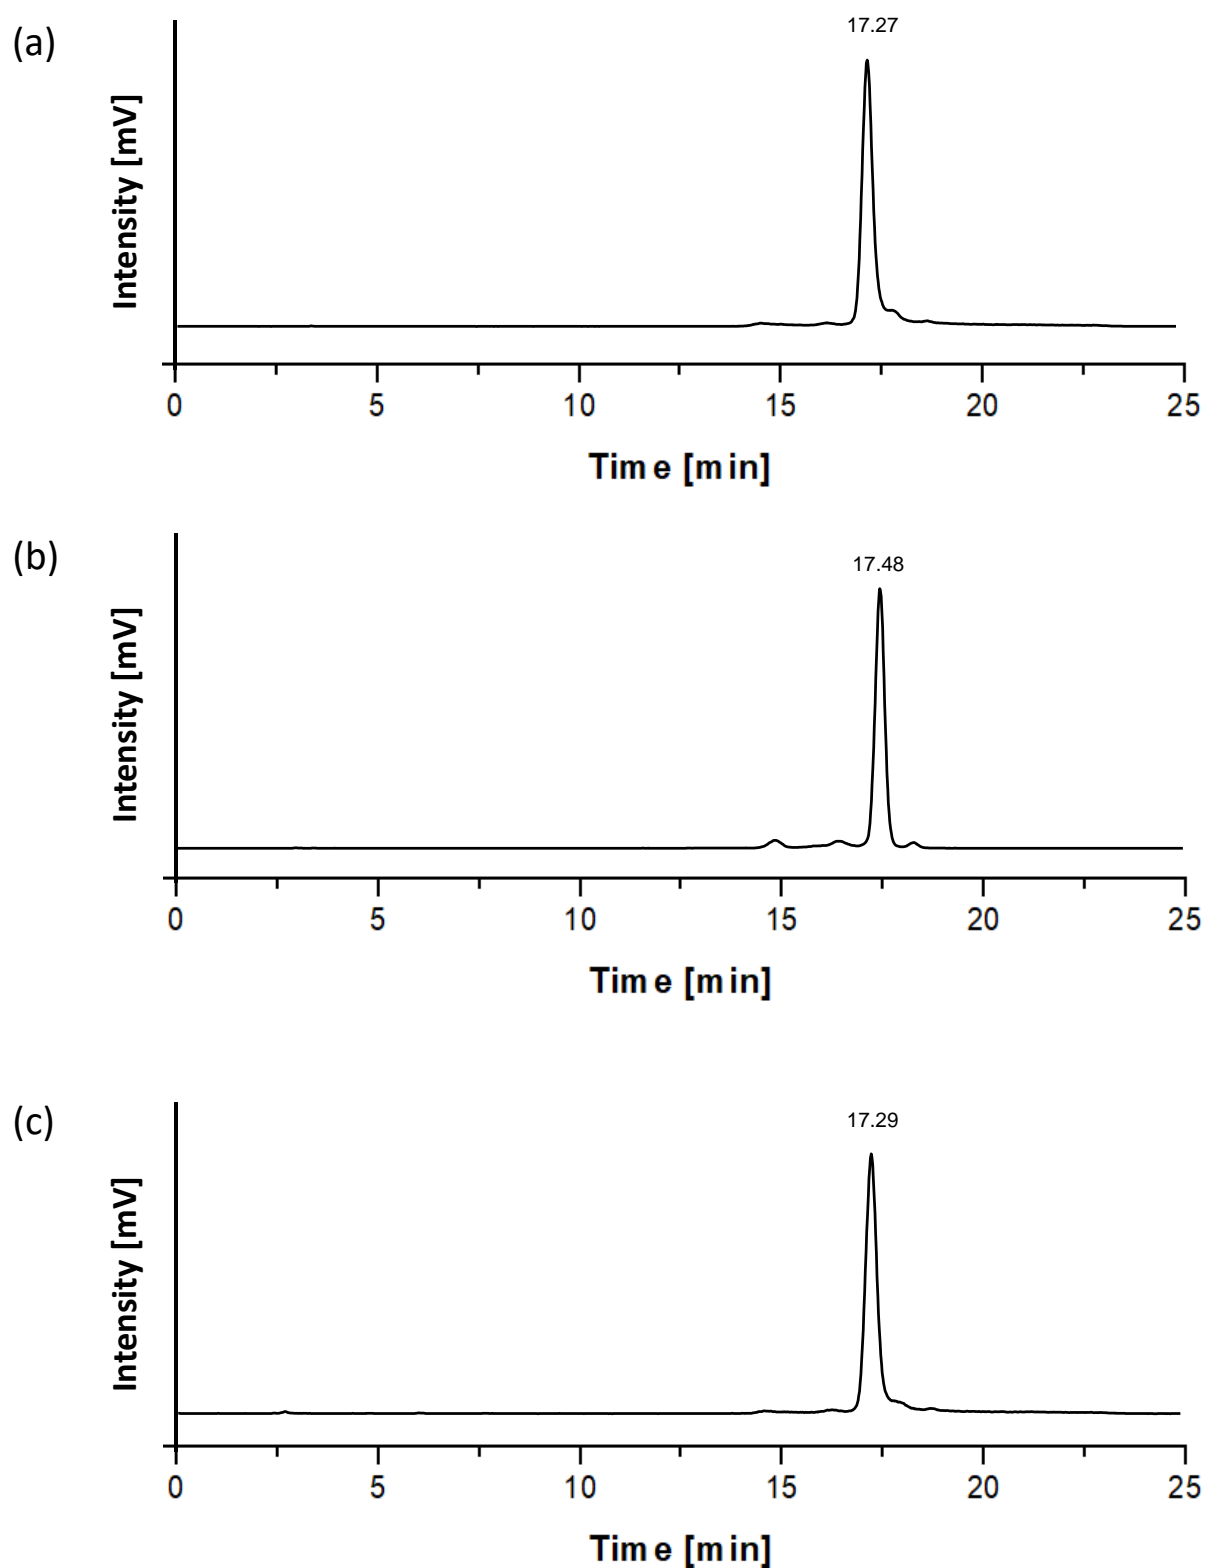

**Figure S3.** Radiochromatogram of (a)  $[^{111}\text{In}]\text{In-DOTA-}[(N\text{-Me})1\text{NaI}^8]\text{MGS5}$  (b)  $[^{68}\text{Ga}]\text{Ga-DOTA-}[(N\text{-Me})1\text{NaI}^8]\text{MGS5}$  and (c)  $[^{177}\text{Lu}]\text{Lu-DOTA-}[(N\text{-Me})1\text{NaI}^8]\text{MGS5}$ .

### *In vitro Characterization of DOTA-[(N-Me)1NaI<sup>8</sup>]MGS5 Labeled with Different Radiometals*

Labeling with different radiometals of DOTA-[(N-Me)1NaI<sup>8</sup>]MGS5 resulted in a similar hydrophilicity of DOTA-[(N-Me)1NaI<sup>8</sup>]MGS5 labeled with different radiometals with values of  $-2.4 \pm 0.3$  for indium-111,  $-2.0 \pm 0.1$  for lutetium-177 and  $-2.2 \pm 0.1$  for gallium-68. Only minor differences in binding to serum proteins were observed depending on the radiometal used for labeling. For the time point of 4 h after incubation, the highest protein binding was found for [<sup>111</sup>In]In-DOTA-[Phe<sup>8</sup>]MGS5 ( $31.9 \pm 0.3\%$ ), followed by [<sup>68</sup>Ga]Ga-DOTA-[(N-Me)1NaI<sup>8</sup>]MGS5 ( $25.5 \pm 1.5\%$ ) and [<sup>177</sup>Lu]Lu-DOTA-[(N-Me)1NaI<sup>8</sup>]MGS5 ( $25.4 \pm 2.3\%$ ). Similar values were found also for <sup>177</sup>Lu-labeled ( $28.7 \pm 7.3\%$ ) and <sup>111</sup>In-labeled peptide ( $39.8 \pm 4.2\%$ ) DOTA-[(N-Me)1NaI<sup>8</sup>]MGS5 for the time point of 24 h after incubation. Incubation in fresh human serum further confirmed a very high stability in vitro of DOTA-[(N-Me)1NaI<sup>8</sup>]MGS5 labeled with different radiometals. No free radiometal and only minor amounts of peptide related radiometabolites could be monitored in the radiochromatograms at 4 h after incubation. Also at the later time point of 24 h after incubation,  $\geq 98\%$  intact radiopeptide was observed for [<sup>111</sup>In]In-DOTA-[2NaI<sup>8</sup>]MGS5 and [<sup>177</sup>Lu]Lu-DOTA-[2NaI<sup>8</sup>]MGS5. The different results of the in vitro characterization of DOTA-[(N-Me)1NaI<sup>8</sup>]MGS5 labeled with different radiometals are summarized in Table 1. As a control, the stability in PBS ( $n = 1$ ) was also tested, confirming a high stability for the DOTA-complex with indium-111 (96.2%), gallium-68 (99.2%) and lutetium-177 (99%) for 4 h after incubation.

**Table S1.** Summary of the analytical data of DOTA-[(N-Me)1NaI<sup>8</sup>]MGS5 labeled with different radiometals

| Compound                                                            | Binding to<br>Serum Proteins [%] |            | LogD<br><i>n</i> = 8 | Intact Radiopeptide<br>in Human Serum [%] |            |
|---------------------------------------------------------------------|----------------------------------|------------|----------------------|-------------------------------------------|------------|
|                                                                     | <i>n</i> = 2                     |            |                      | <i>n</i> = 2                              |            |
|                                                                     | 4 h                              | 24 h       |                      | 4 h                                       | 24 h       |
| [ <sup>111</sup> In]In-DOTA-[( <i>N</i> -Me)1NaI <sup>8</sup> ]MGS5 | 31.9 ± 0.3                       | 39.8 ± 4.2 | −2.4 ± 0.3           | 99.3 ± 0.9                                | 99.6 ± 0.1 |
| [ <sup>177</sup> Lu]Lu-DOTA-[( <i>N</i> -Me)1NaI <sup>8</sup> ]MGS5 | 25.4 ± 2.3                       | 28.7 ± 7.3 | −2.0 ± 0.1           | 98.3 ± 0.5                                | 98.5 ± 1.2 |
| [ <sup>68</sup> Ga]Ga-DOTA-[( <i>N</i> -Me)1NaI <sup>8</sup> ]MGS5  | 25.5 ± 1.5                       | n.d.       | −2.2 ± 0.1           | 99.9 ± 0.0                                | n.d.       |

### *Cell Internalization of DOTA-[(N-Me)1NaI<sup>8</sup>]MGS5 Labeled with Different Radiometals*

The receptor-specific internalization of DOTA-[(N-Me)1NaI<sup>8</sup>]MGS5 labeled with different radiometals was studied for the time point of 2 h after incubation. In analogy to the varying tumor uptake observed in vivo, [<sup>111</sup>In]In-DOTA-[(N-Me)1NaI<sup>8</sup>]MGS5 demonstrated the highest receptor-mediated cell internalization with the value of  $31.5 \pm 6.7\%$ . [<sup>177</sup>Lu]Lu-DOTA-[(N-Me)1NaI<sup>8</sup>]MGS5 showed a similar receptor-specific cell uptake of  $30.8 \pm 5.5\%$ . For [<sup>68</sup>Ga]Ga-DOTA-[(N-Me)1NaI<sup>8</sup>]MGS5 a much lower cell uptake of  $20.4 \pm 2.3\%$  was found for the same time point.

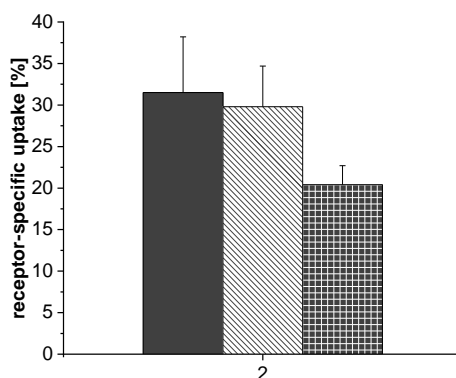

**Figure S4.** Cell internalization of DOTA-[(N-Me)1NaI<sup>8</sup>]MGS5 labeled with different radiometals 2 h after incubation. Gray: indium-111, striped: lutetium-177 and checked: gallium-68.

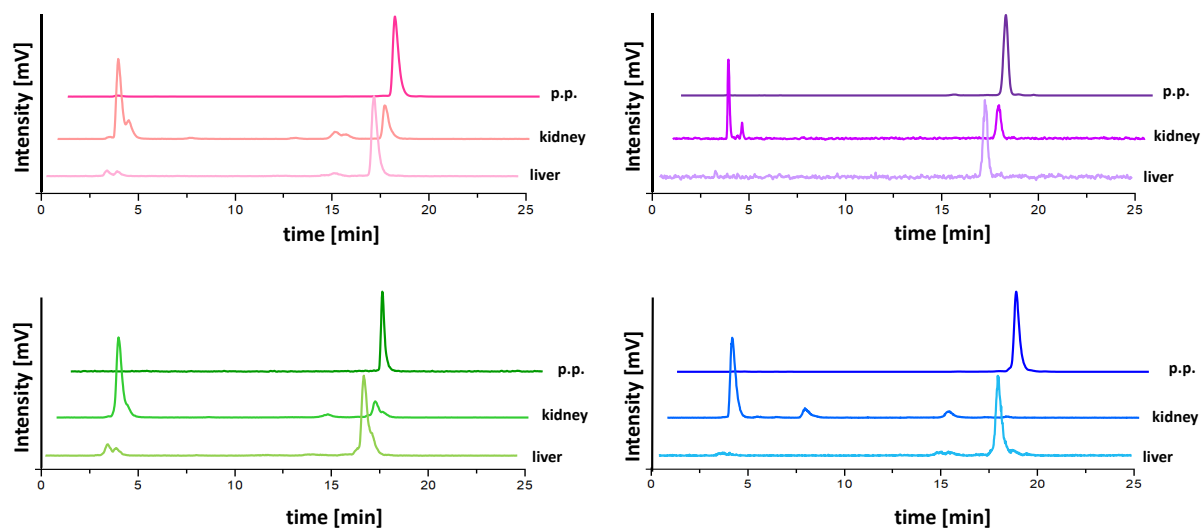

**Figure S5.** Representative radiochromatograms of the <sup>111</sup>In-labeled peptides post preparation (p.p.), as well as kidney and liver samples obtained from BALB/c mice 10 min p.i. Pink: DOTA-[2NaI<sup>8</sup>]MGS5, green: DOTA-[DLys<sup>1</sup>]MGS5, purple: DOTA-[(N-Me)1NaI<sup>8</sup>]MGS5, blue: DOTA-MGS5[NHCH<sub>3</sub>].
